# Supplementary material for: Haemophilin-Producing Strains of Haemophilus haemolyticus Protect Respiratory Epithelia from NTHi Colonisation and Internalisation
Source: PubMed Central journal article supplement (PMC7823694; doi:10.3390/pathogens10010029), 2021-01-01
Supplement: pathogens-10-00029-s001.pdf [file pathogens-10-00029-s001.pdf]

SUPPLEMENTARY DATA

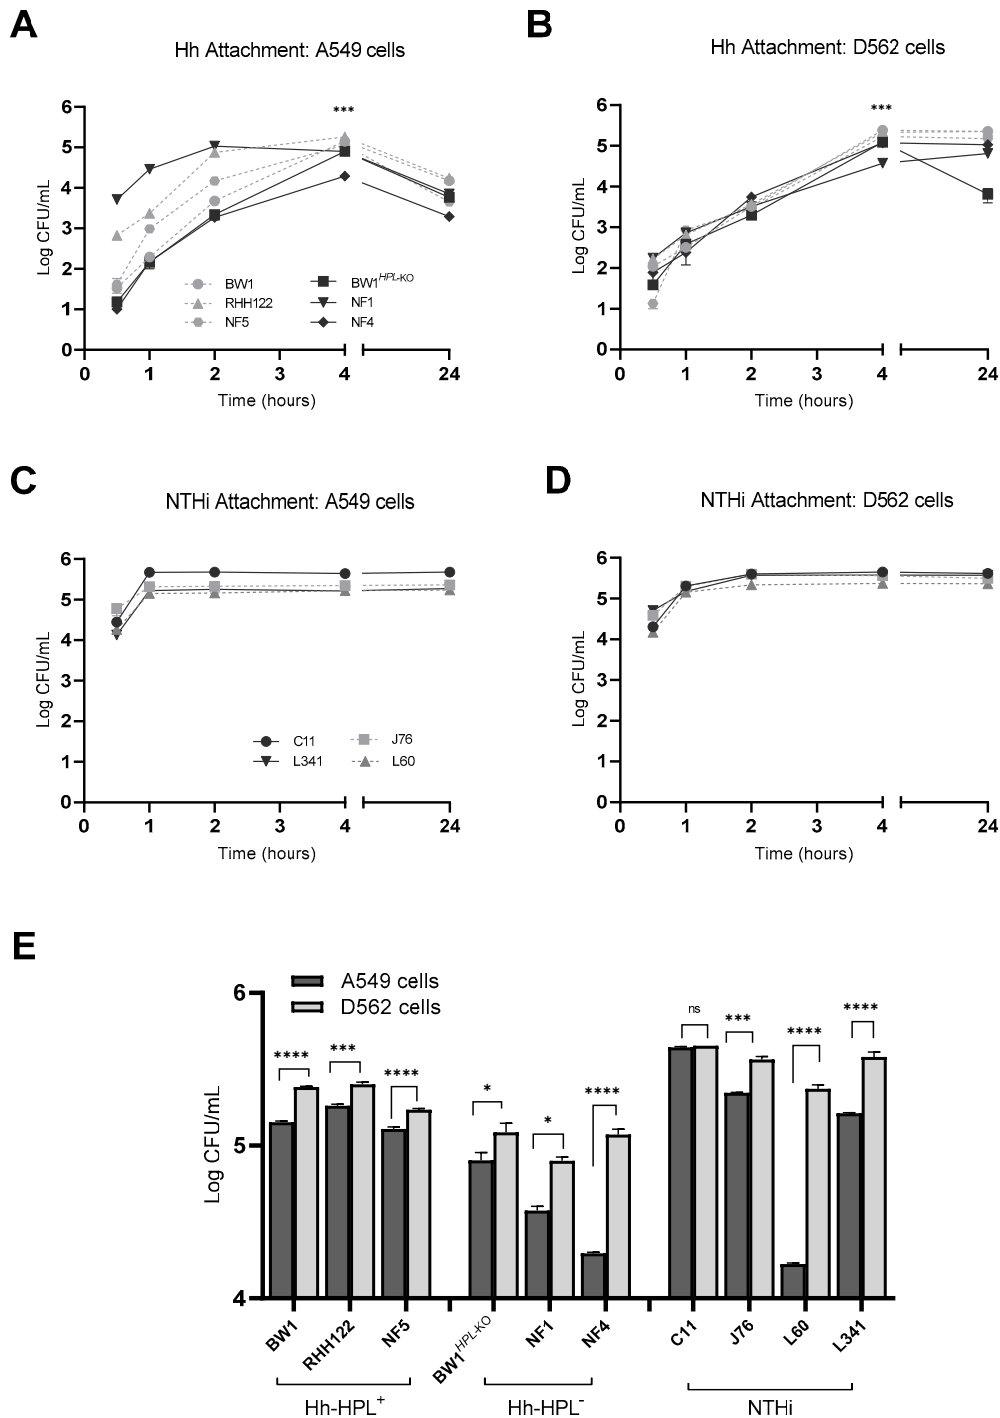

**Figure S1] Baseline bacterial attachment to epithelial cells.** Colony counts (CFU/mL) of Hh attached to A549 (A), and D562 (B) cell monolayers, showing significant variation between Hh strains. Colony counts (CFU/mL) of NTHi to A549 (C), and D562 (D) during a 24-hour incubation period. A summary of Hh and NTHi attachment to A549 and D562 cell monolayers at maximum attachment time points is shown (E). Error bars represent the  $\pm$ SEM or three biological replicates. ns not significant, \*  $p < 0.05$ , \*\*\*  $p < 0.001$ , \*\*\*\*  $p < 0.0001$ .

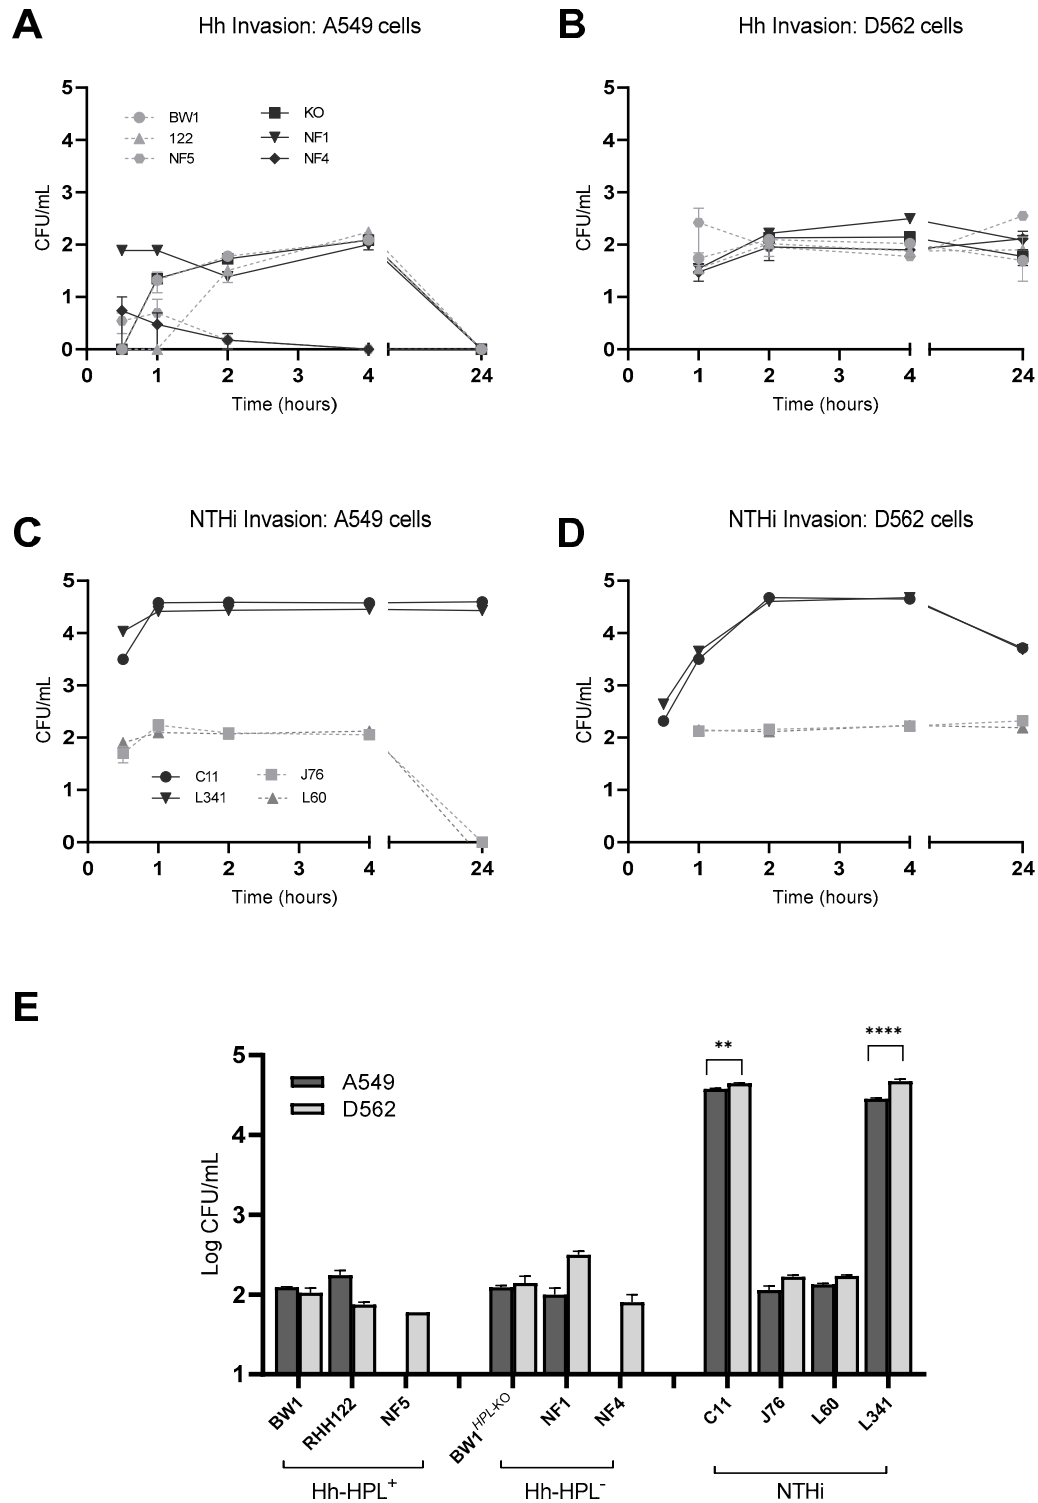

**Figure S2| Baseline bacterial invasion of epithelial cells.** Colony counts (CFU/mL) of internalised Hh in A549 (A), and D562 (B) cell monolayers, and NTHi in A549 (C), and D562 (D) during a 24-hour incubation period. A summary of Hh and NTHi invasion of A549 and D562 cell monolayers at maximum invasion time points is shown (E). Error bars represent the  $\pm$ SEM or three biological replicates. <sup>ns</sup> not significant, \*  $p < 0.05$ , \*\*  $p < 0.01$ , \*\*\*  $p < 0.001$ , \*\*\*\*  $p < 0.0001$ .

**Table S1 | Specific Hh treatment load (CFU/mL) for competitive colonisation experiments, standardised for differences in attachment capacity.**

| Hh strain             | Treatment load for A549 cells (CFU/mL) | Treatment load for D562 cells (CFU/mL) |
|-----------------------|----------------------------------------|----------------------------------------|
| BW1                   | $1.50 \times 10^5$                     | $2.50 \times 10^5$                     |
| BW1 <sup>HPL-KO</sup> | $3.00 \times 10^5$                     | $5.00 \times 10^5$                     |
| RHH122                | $1.50 \times 10^5$                     | $2.50 \times 10^5$                     |
| NF1                   | $3.00 \times 10^6$                     | $1.25 \times 10^6$                     |
| NF4                   | $1.50 \times 10^5$                     | $5.00 \times 10^5$                     |
| NF5                   | $1.50 \times 10^5$                     | $5.00 \times 10^5$                     |

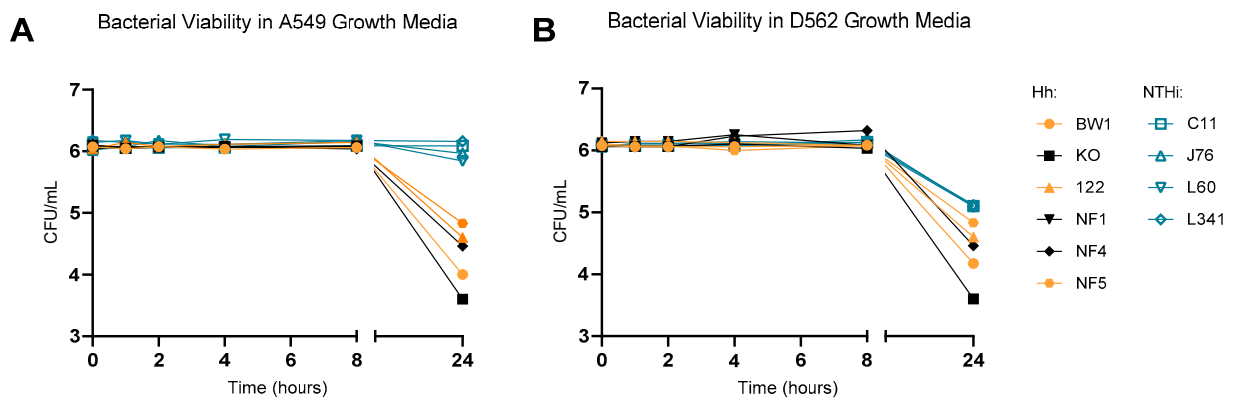

**Figure S3 | Bacterial viability in cell culture media.** Colony counts (CFU/mL) Hh and NTHi strains grown in RPMI (A549 growth media) **(A)**, and EMEM (D562 growth media) **(B)** over 24 hours. Error bars represent the  $\pm$ SEM of two biological replicates.

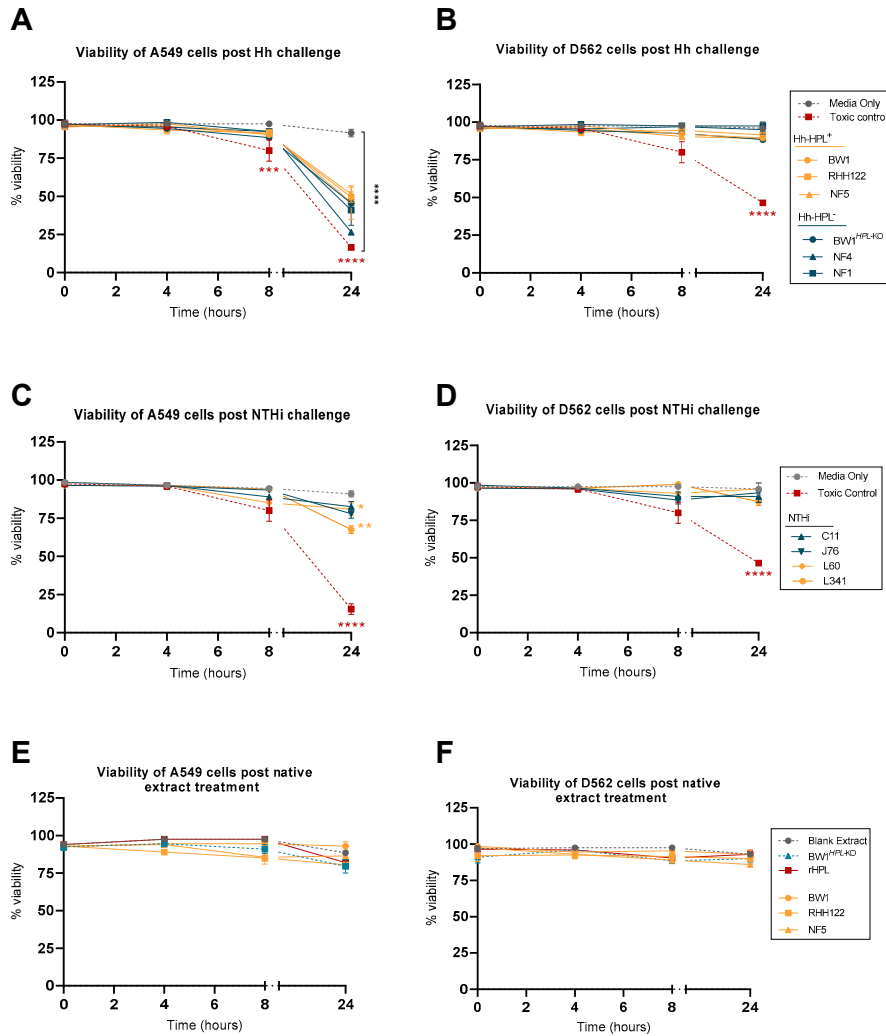

**Figure S4 | Viability of respiratory epithelium post bacterial challenge.** Effect of 24-hour Hh challenge on A549 (A), and D562 (B) cell viability, compared to media alone. Effect of 24-hour NTHi challenge on A549 (C), and D562 (D) cell viability, compared to media alone. Effect of 24-hour HPL treatment on A549 (E), and D562 (F) cell viability, compared to media alone. Error bars represent the  $\pm$ SEM of three biological replicates. \*  $p < 0.05$ , \*\*  $p < 0.005$ , \*\*\*\*  $p < 0.0001$ .

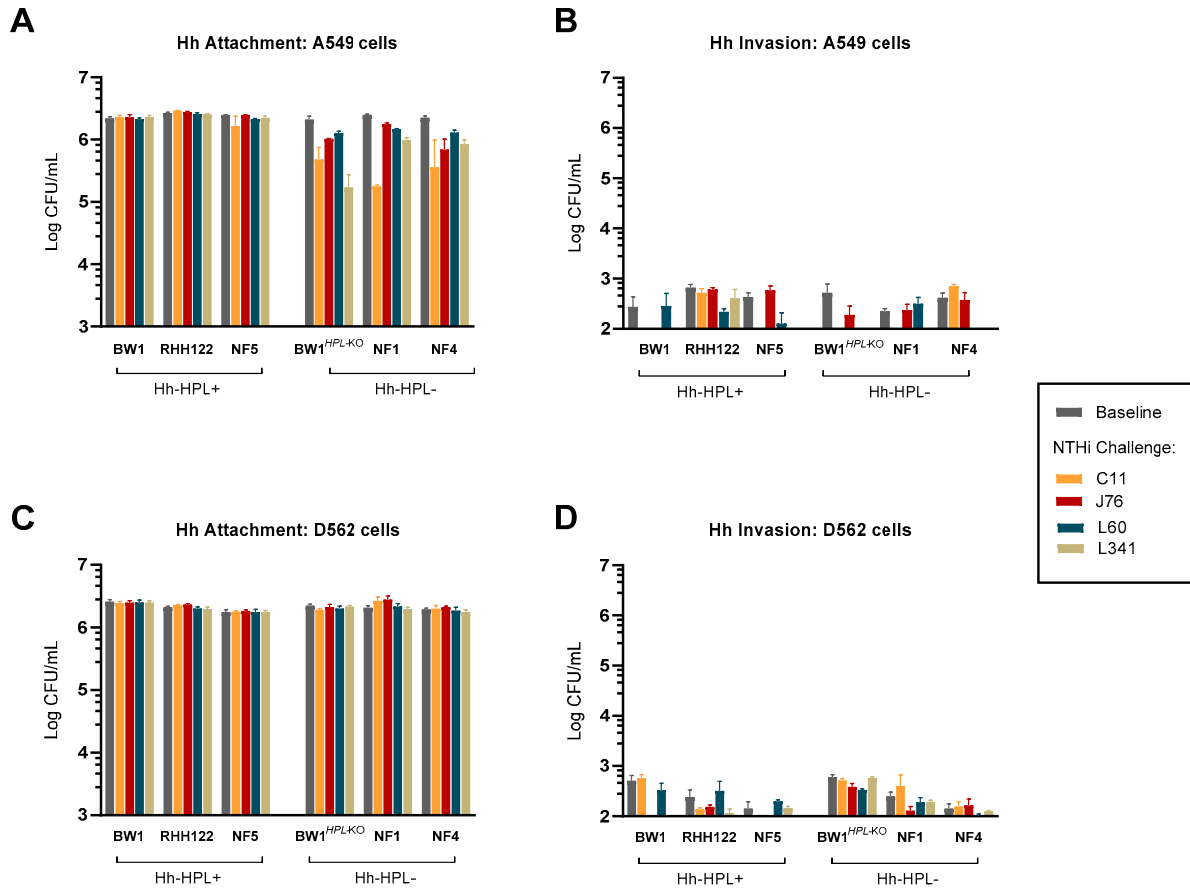

**Figure S5 | Hh attachment and invasion of A549 and D562 cells post NTHi challenge.** Colony counts (CFU/mL) of Hh attached to A549 (**A**) and D562 (**B**) cell monolayers post NTHi challenge. Colony counts (CFU/mL) of internalised Hh after exposure to A549 (**C**) and D562 (**D**) cell monolayers post NTHi challenge. Error bars represent the  $\pm$ SEM of three biological replicates, measured triplicate. \* $p < 0.05$ , \*\*\*\*  $p < 0.0001$ .

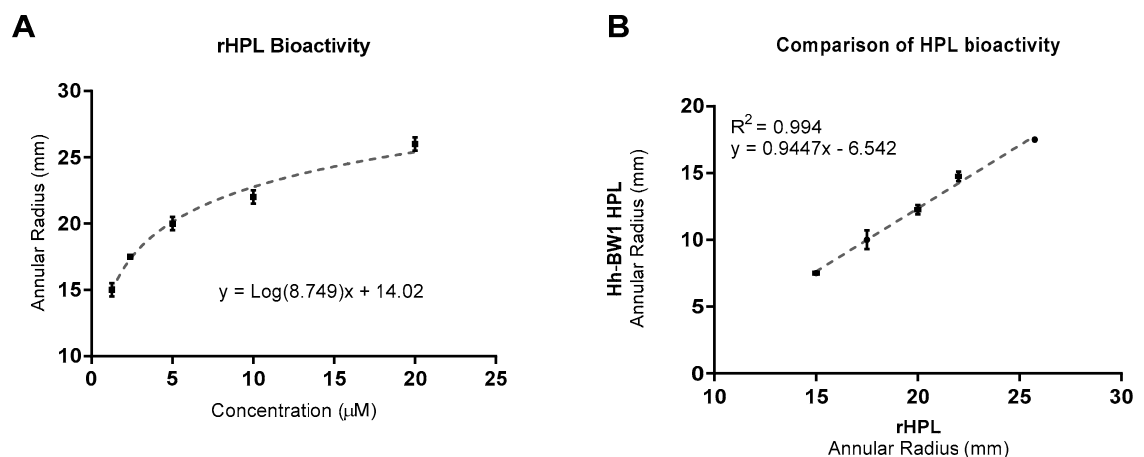

**Figure S6 | Bioactivity of recombinant and native HPL.** Annular radius of inhibitory zones produced by serial 2-fold dilutions of rHPL on agar containing indicator strain NTHi-252 (**A**). Linear regression comparing the relationship between concentration and anti-NTHi inhibitory activity of rHPL and nHPL from Hh-BW1 (**B**).
